# Supplementary material
Source: Springer Nature journal article supplement (https://www.springermedizin.de/resource/supplementary/12936_2011_1918_MOESM3_ESM.pdf/9541982)

- 4.** Infected anopheles biting individual indicated by number.
- 4.** Individual indicated by number developing malaria.

|            |                               |          |
|------------|-------------------------------|----------|
| Anopheline | I-III James' experi-<br>ments | Human    |
| Epirootic. | 5-6 Our own experi-<br>ments  | Epidemic |

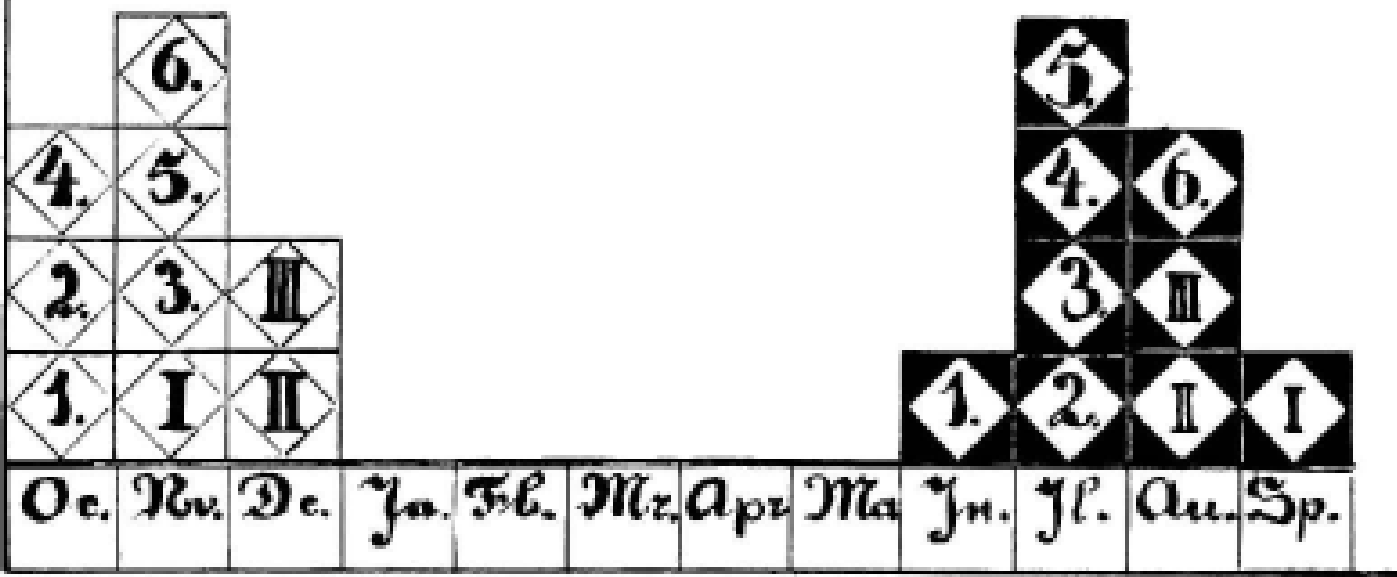

Supplement: MOESM3 [file 9541982]
